# Supplementary material
Source: publisher figshare collection journal article supplement (https://frontiersin.figshare.com/ndownloader/files/26819060)
Supplement: Supplementary file [file 26819060]

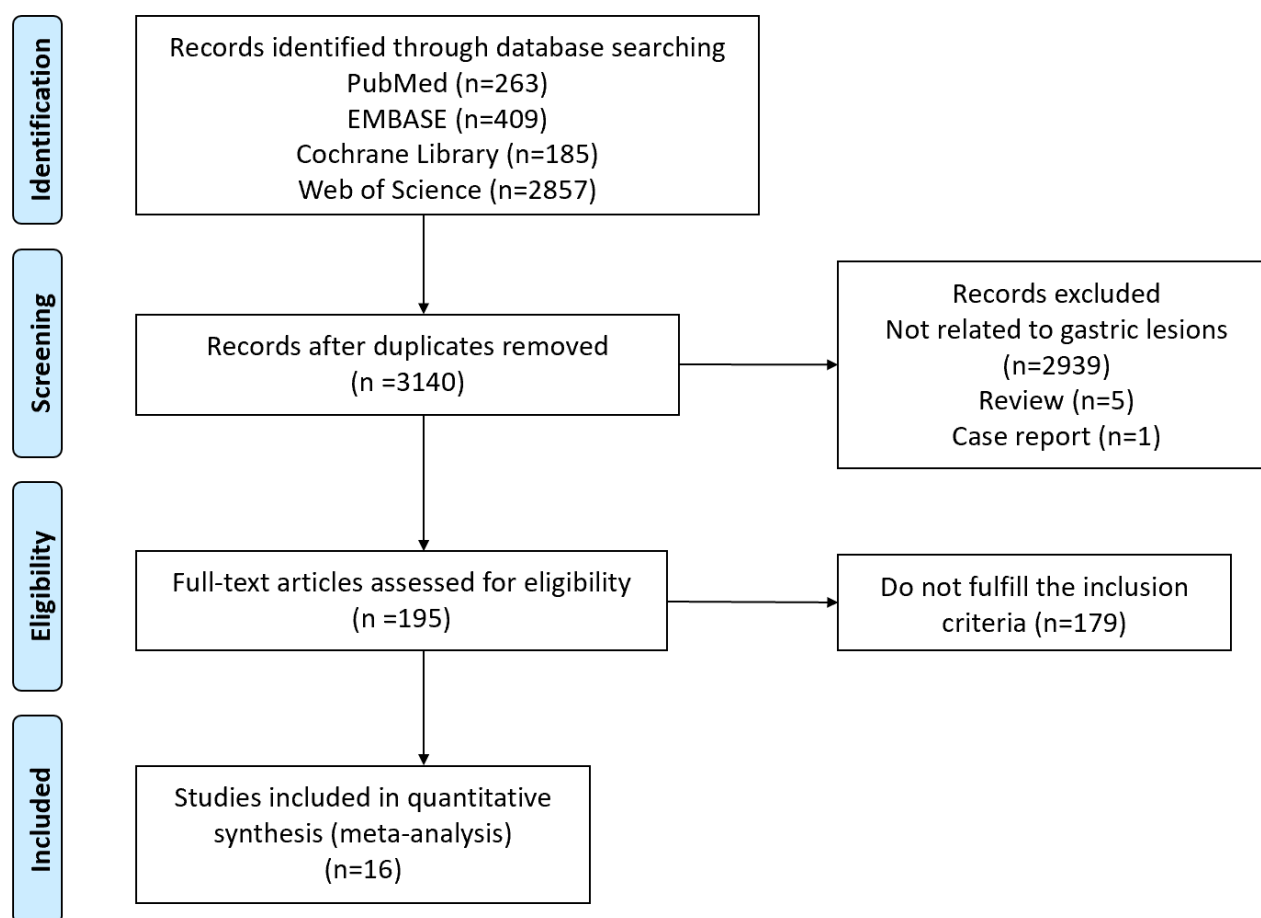

Supplemental Figure1. Literature screening flow according to PRISMA

| Study                       | Year | Risk of Bias       |            |                    |                 | Applicability Concerns |            |                    |
|-----------------------------|------|--------------------|------------|--------------------|-----------------|------------------------|------------|--------------------|
|                             |      | Patients Selection | Index Test | Reference Standard | Flow and Timing | Patients Selection     | Index Test | Reference Standard |
| Hong Jin Yoon               | 2019 | +                  | +          | +                  | +               | +                      | +          | +                  |
| Bum-Joo Cho                 | 2019 | -                  | +          | ?                  | +               | +                      | +          | +                  |
| Y. Sakai                    | 2018 | +                  | +          | ?                  | +               | +                      | +          | ?                  |
| Yusuke Horiuchi             | 2019 | +                  | +          | ?                  | +               | +                      | +          | +                  |
| Lan Li                      | 2019 | +                  | +          | +                  | +               | +                      | +          | +                  |
| Toshiaki Hirasawa           | 2018 | -                  | +          | +                  | +               | ?                      | +          | +                  |
| Yan Zhu                     | 2019 | +                  | +          | +                  | +               | +                      | +          | +                  |
| Takashi Kanesaka            | 2017 | +                  | +          | +                  | +               | ?                      | +          | +                  |
| Lianlian Wu                 | 2018 | +                  | +          | +                  | +               | +                      | +          | ?                  |
| Rie Miyaki                  | 2013 | ?                  | +          | +                  | +               | ?                      | +          | ?                  |
| Yohei Ikenoyama             | 2020 | +                  | +          | +                  | +               | +                      | +          | ?                  |
| Hussam Ali                  | 2018 | ?                  | +          | +                  | +               | -                      | +          | ?                  |
| Bum-Joo Cho <sup>[18]</sup> | 2019 | +                  | +          | +                  | +               | +                      | +          | +                  |
| Yusuke Horiuchi             | 2020 | +                  | +          | +                  | +               | +                      | +          | +                  |
| Hiroya Ueyama               | 2020 | +                  | +          | +                  | +               | +                      | +          | +                  |
| Liming Zhang                | 2020 | ?                  | +          | +                  | +               | -                      | +          | +                  |

Supplemental Figure 2. Quality of included studies according to QUADAS-2 scale.

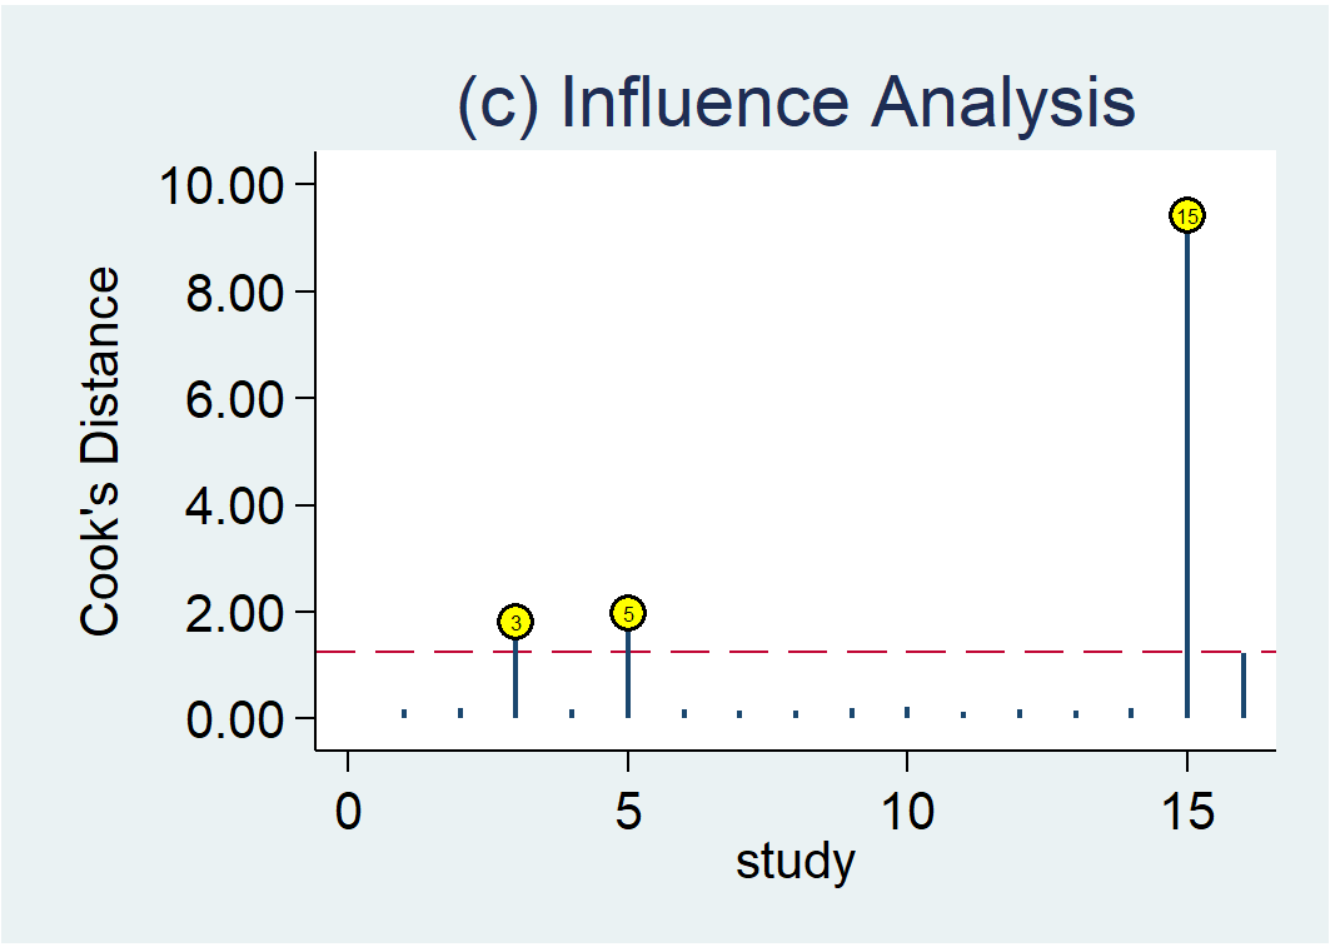

Supplemental Figure 3. Influence analysis showed the significantly heterogeneity in Bum-Joo Cho, Hiroya Ueyama and Yusuke Horiuchi's study.

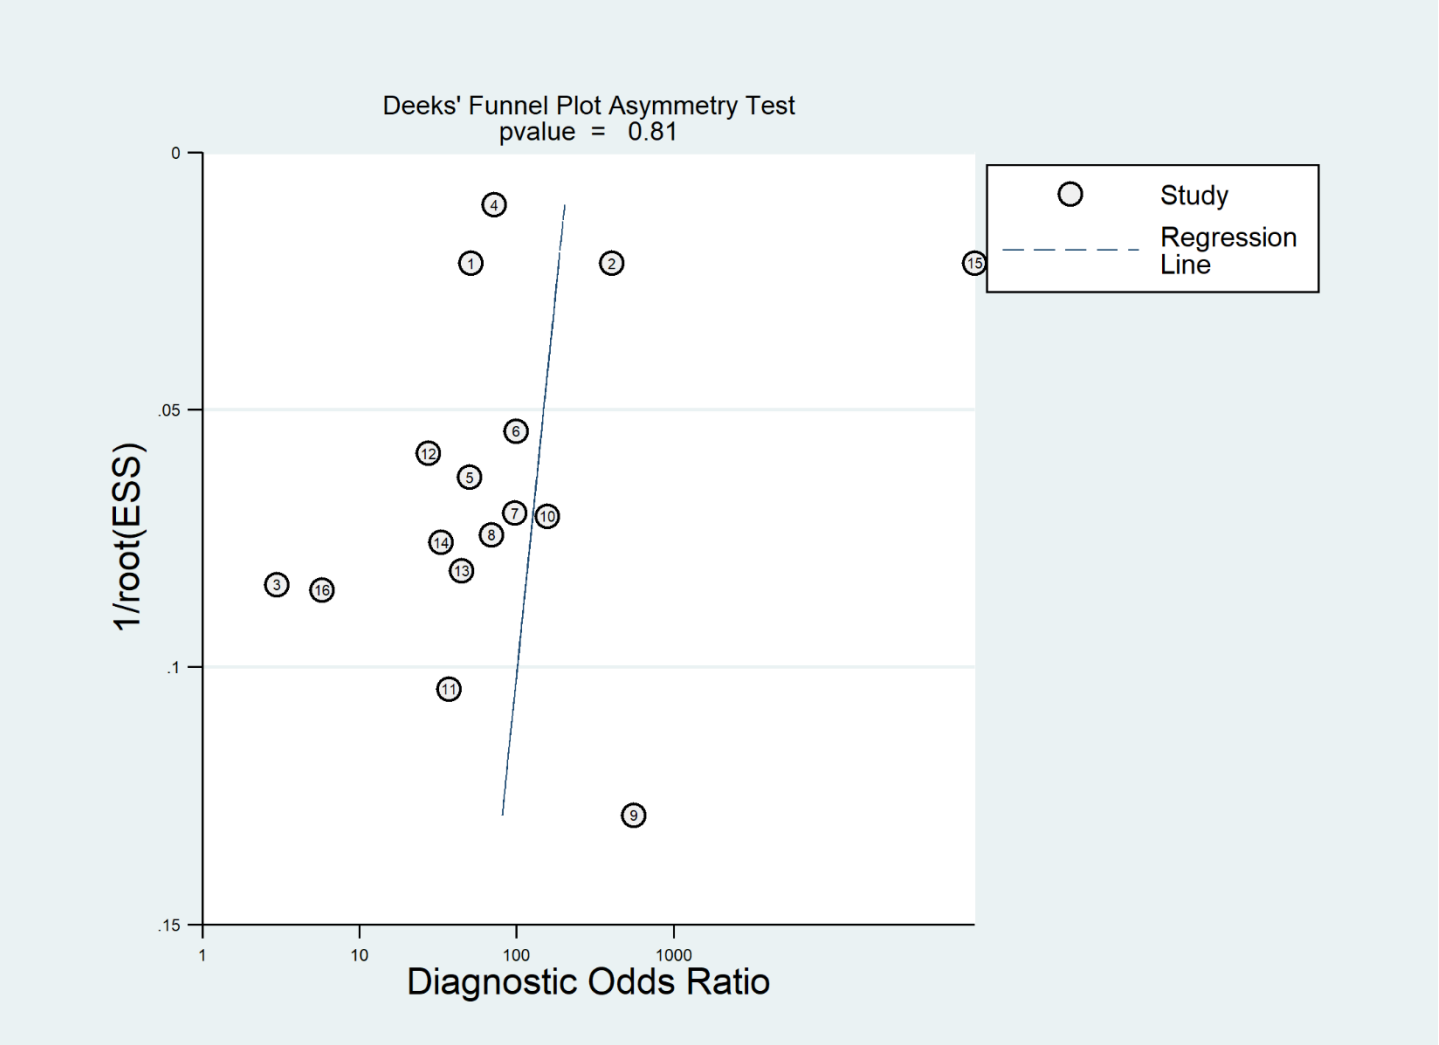

Supplemental Figure 4. Funnel plot showed no publication bias among the included studies.
